# Supplementary material
Source: PubMed Central journal article supplement (PMC3457451)

**Principal coordinate analysis of relative abundances of bacterial taxa between Crohn's disease patients and controls.** The distance matrix was constructed using Bray Curtis similarity.

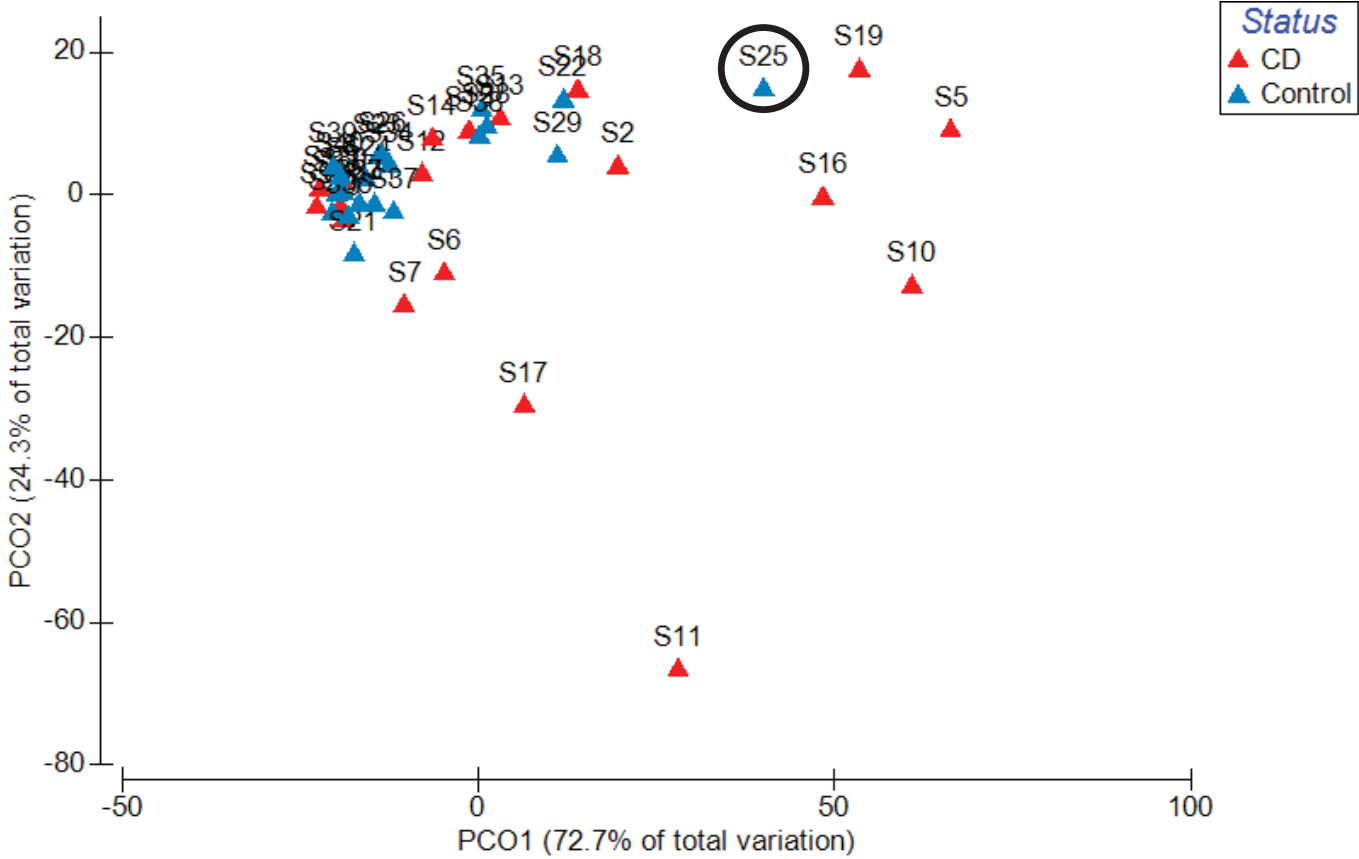

Supplement: JCM.01396-12_zjm999091956so1.pdf [file JCM.01396-12_zjm999091956so1.pdf]
